# Supplementary material
Source: publisher figshare collection journal article supplement (https://frontiersin.figshare.com/ndownloader/files/17961767)
Supplement: Supplementary file 1 [file 17961767]

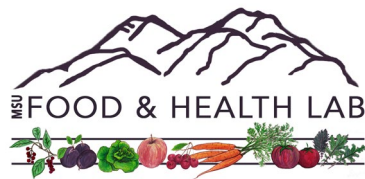

## Plant-based versus Animal Protein Sources

**Table 1: Greenhouse gas emissions, land use, and water use required for production of plant-based versus animal protein sources <sup>1, 2</sup>**

| Protein Source                              | Beef<br>(20% protein) | Pork<br>(20% protein) | Poultry<br>(20% protein) | Eggs<br>(13% protein) | Pulses<br>(20-36% protein) |
|---------------------------------------------|-----------------------|-----------------------|--------------------------|-----------------------|----------------------------|
| GHG (CO <sub>2</sub> eqs / kg protein)      | 45 - 640              | 20 - 55               | 10 - 30                  | 15 - 42               | 4 - 10                     |
| Land use (m <sup>2</sup> /yr/kg of protein) | 37 - 2,100            | 40 - 75               | 23 - 40                  | 29 - 52               | 10 - 43                    |
| Water use liter/g protein                   | 112                   | 57                    | 34                       | 29                    | 19                         |

**Table 2: US average price per 100 g of plant-based versus animal protein sources <sup>3</sup>**

| Protein Source | Beef<br>(lean and extra lean) | Pork<br>(boneless chops) | Poultry<br>(boneless chicken breast) | Egg<br>(~2 whole) | Lentils<br>(1/2 cup dry) |
|----------------|-------------------------------|--------------------------|--------------------------------------|-------------------|--------------------------|
| Price / 100 g  | \$ 1.16                       | \$ 0.83                  | \$ 0.69                              | \$ 0.27           | \$ 0.12                  |

**Table 3: Nutrient comparisons per 100 g of plant-based versus animal protein sources <sup>4</sup>**

| Per 100g          | Ground Beef<br>80/20 (~4 oz) | Pork<br>(~4 oz) | Poultry<br>(~4 oz) | Egg<br>(~2 whole) | Lentils<br>(1/2 cup cooked) |
|-------------------|------------------------------|-----------------|--------------------|-------------------|-----------------------------|
| Calories          | 254                          | 263             | 243                | 143               | 116                         |
| Carb (g)          | 0                            | 0               | 0                  | 1                 | 20                          |
| Dietary Fiber (g) | 0                            | 0               | 0                  | 0                 | 8                           |
| Protein (g)       | 17                           | 17              | 15                 | 13                | 9                           |
| Fat (g)           | 20                           | 21              | 20                 | 10                | <1                          |
| Cholesterol (mg)  | 1                            | 72              | 143                | 372               | 0                           |
| Iron (mg)         | 1.9                          | 0.9             | 1.2                | 1.8               | 3.3                         |
| Potassium (mg)    | 269                          | 287             | 104                | 138               | 369                         |
| Sodium (mg)       | 66                           | 56              | 40                 | 142               | 2                           |
| Zinc (mg)         | 4.2                          | 2.2             | 1.9                | 1.3               | 1.3                         |
| Thiamin (mg)      | 0.04                         | 0.73            | 0.10               | 0.04              | 0.17                        |
| Calcium (mg)      | 18                           | 14              | 187                | 56                | 19                          |
| Magnesium(mg)     | 17                           | 19              | 12                 | 12                | 36                          |
| Folate (µg)       | 7                            | 5               | 5                  | 47                | 181                         |

**References:** <sup>1</sup> Mekonnen, M. M. & Hoekstra, A. Y. A Global Assessment of the Water Footprint of Farm Animal Products. *Ecosystems* **15**, 401–415 (2012), <sup>2</sup> Nijdam, D., Rood, T. & Westhoek, H. The price of protein: Review of land use and carbon footprints from life cycle assessments of animal food products and their substitutes. *Food Policy* **37**, 760–770 (2012), <sup>3</sup> United States Dept of Labor: Bureau of Labor and Statistics, Average Retail Food and Energy Prices, U.S. December 2018, accessed 2/6/2019, <sup>4</sup> USDA Food Composition Database, accessed 2/6/2019

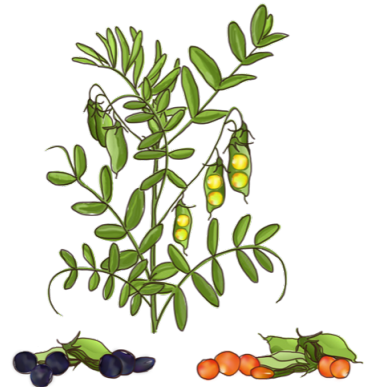

For more information contact Teresa Warne at [teresa.warne@montana.edu](mailto:teresa.warne@montana.edu)

Artwork by:  
Angie Mangels

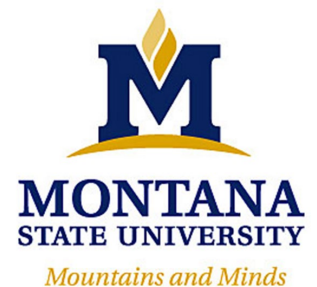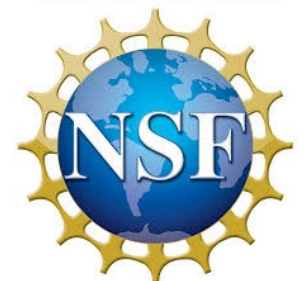

WAFERx  
WATER AGRICULTURE FOOD ENERGY RESEARCH NEXUS  
<http://waferx.montana.edu/>

This project is part of the Water Agriculture Food Energy Research Nexus (WAFERx). WAFERx is supported by the National Science Foundation under the EPSCoR Track II Cooperative Agreement No. OIA-1632810. Any opinions, findings, conclusions, or recommendations are those of the author(s) and do not necessarily reflect the views of the National Science Foundation.
